# Supplementary material
Source: MDPI journal article supplement (https://www.mdpi.com/2079-9292/8/1/74)

## Lacquer Film Thickness Record

After completing the spray painting in the spray painting line, the automobile is sent to the drying room for high temperature drying. The paint thickness (the thickness of the film) of each sampling point is measured by a professional high-precision paint thickness gauge. The image of the paint thickness of the sampling point is shown in the following pictures. In these pictures, the position of the paint thickness data at the sampling points is corresponding to the position of the discrete points on the actual automobile body measured by the actual paint thickness gauge. The paint thickness situation at discrete points on each part of the automobile body can be seen directly according to the paint thickness data record table. As is shown in the figure ①, ② and ③, they are the color paint coating thickness record of the car. As is shown in the figure ④ and ⑤, they are the primer coating thickness record of the car.

①

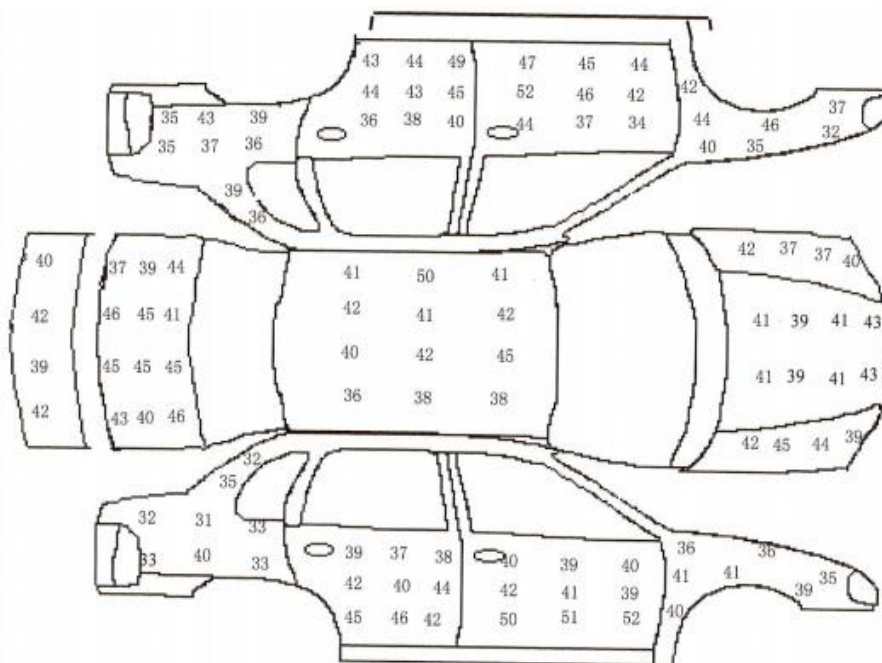

②

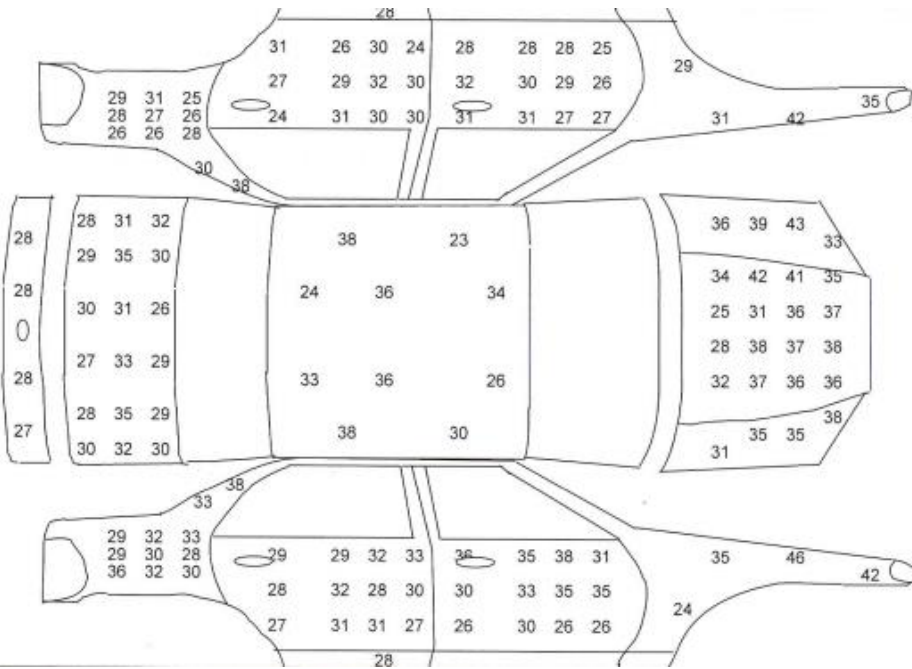

③

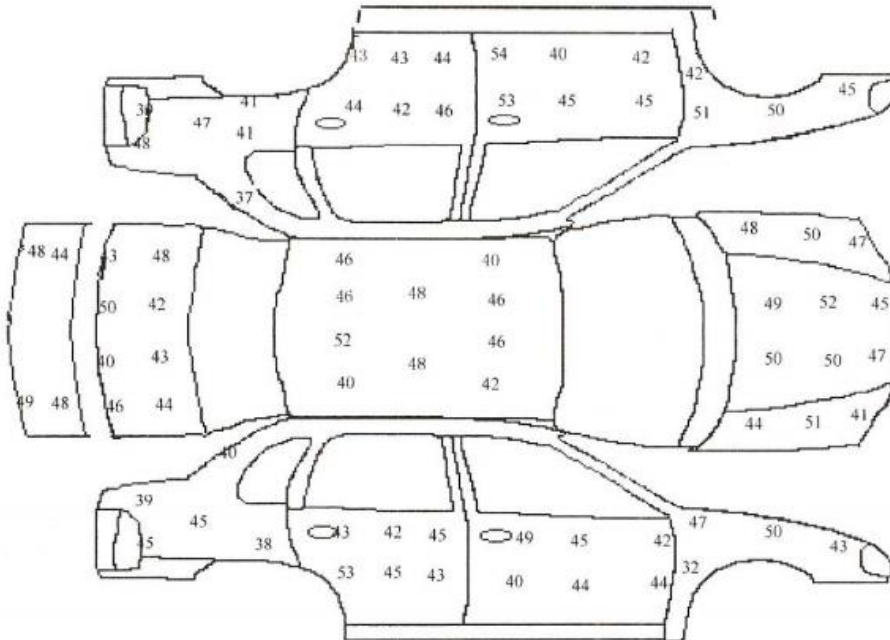

④

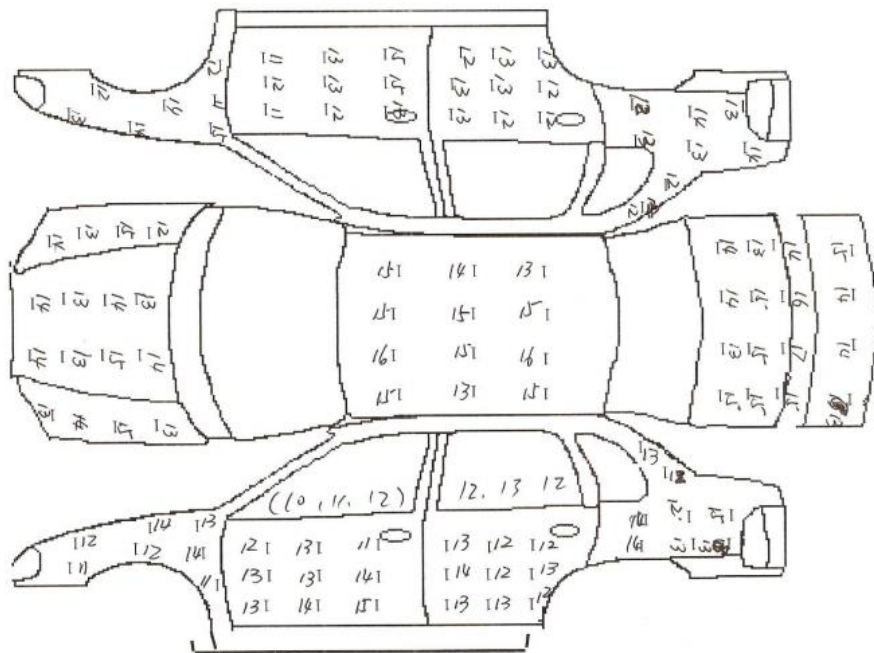

⑤

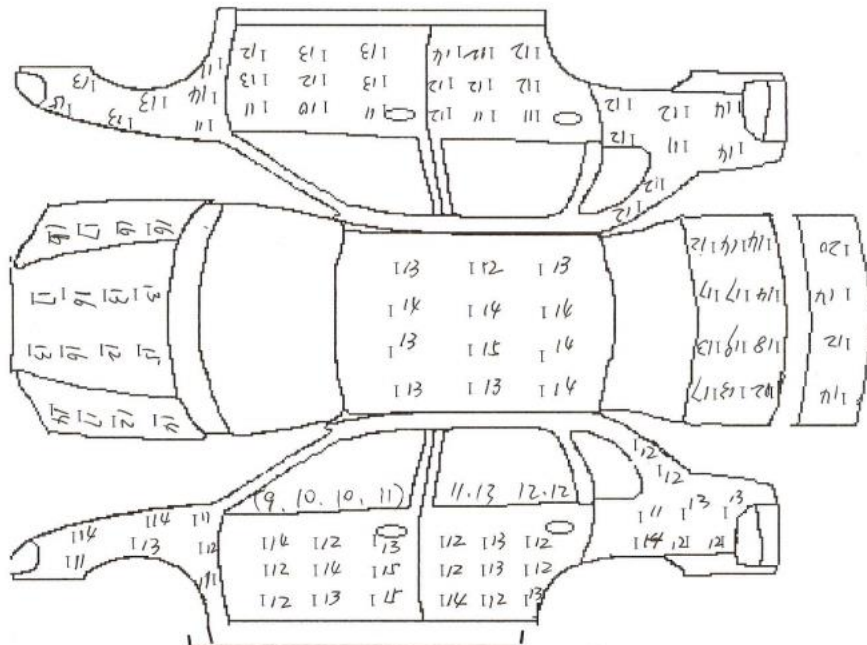

## Spraying trajectory diagram

According to the algorithm and spraying requirements, the car is sprayed according to a certain trajectory, different colors represent different trajectories. In the figure ③, Trajectory optimization with new type automobile has achieved good results and met the requirements of spraying.

①

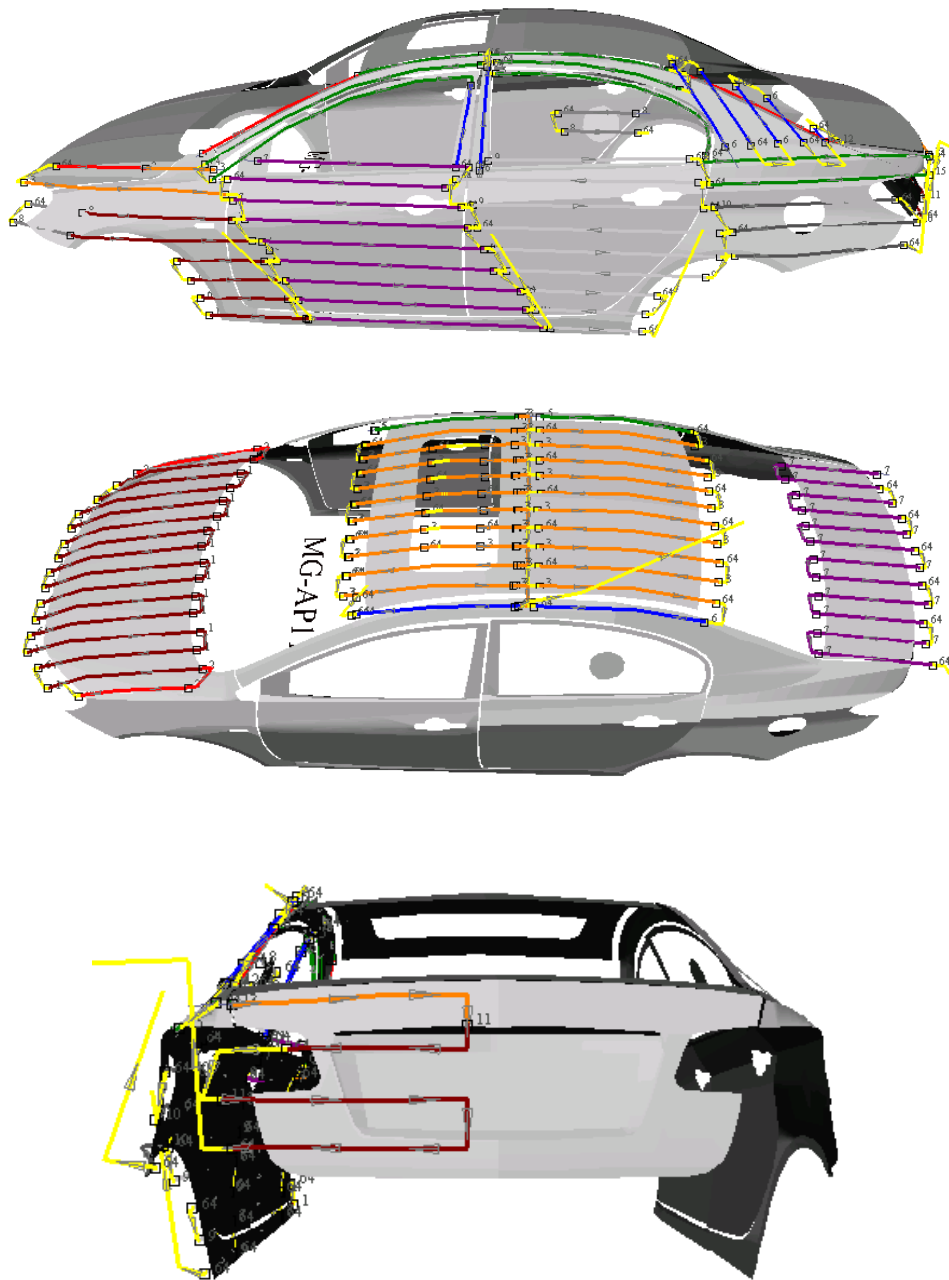

②

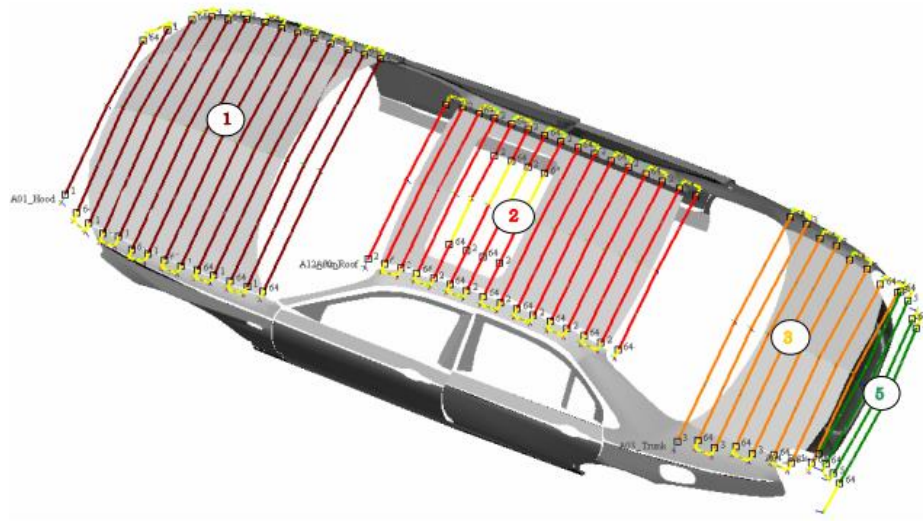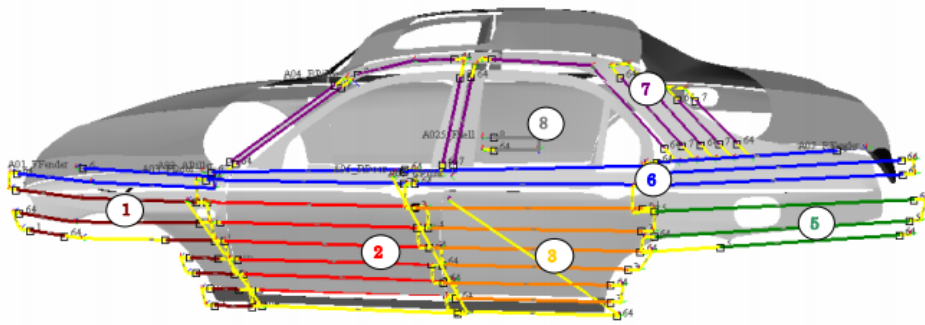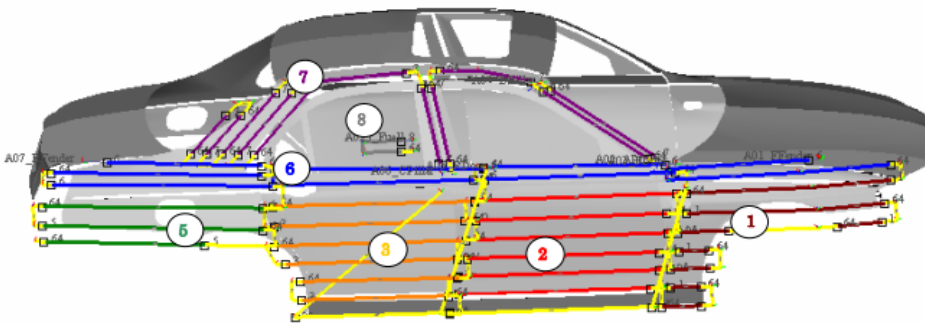

### ③ Open-topped limousine

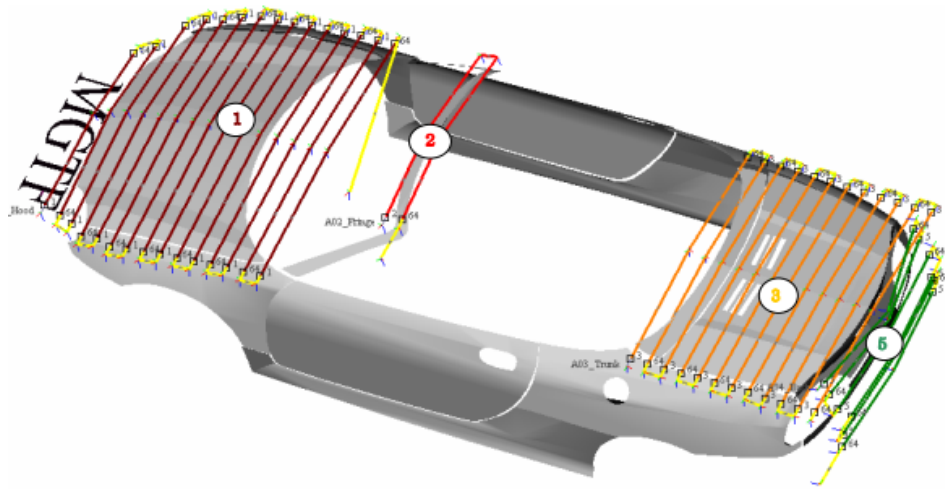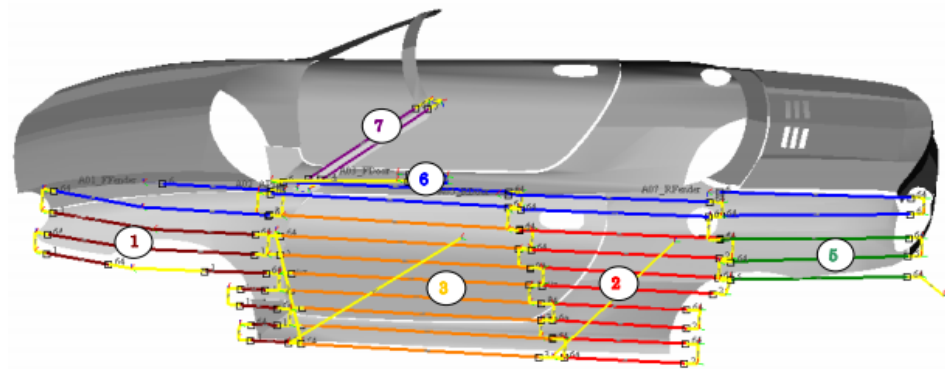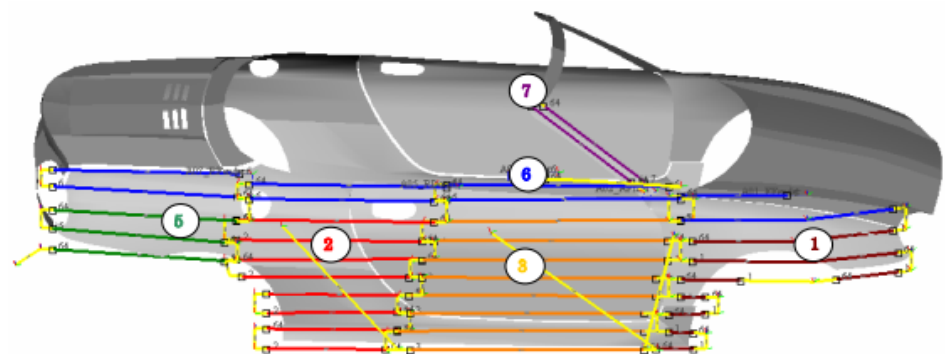



④

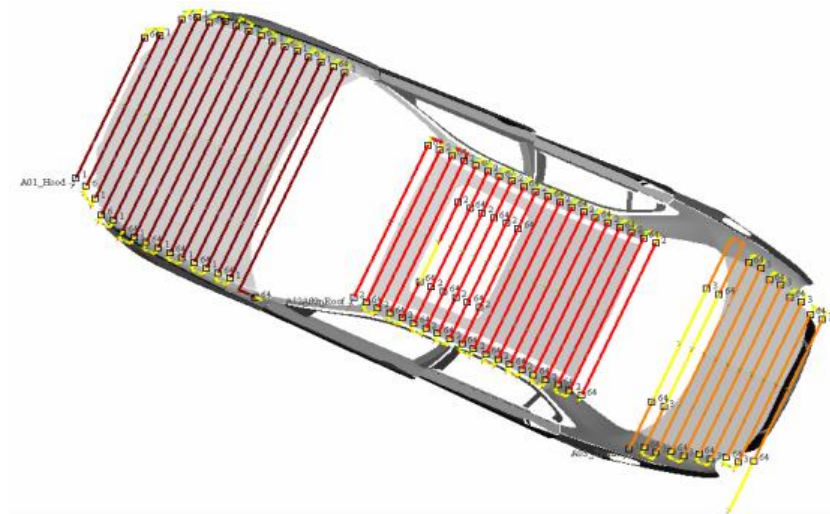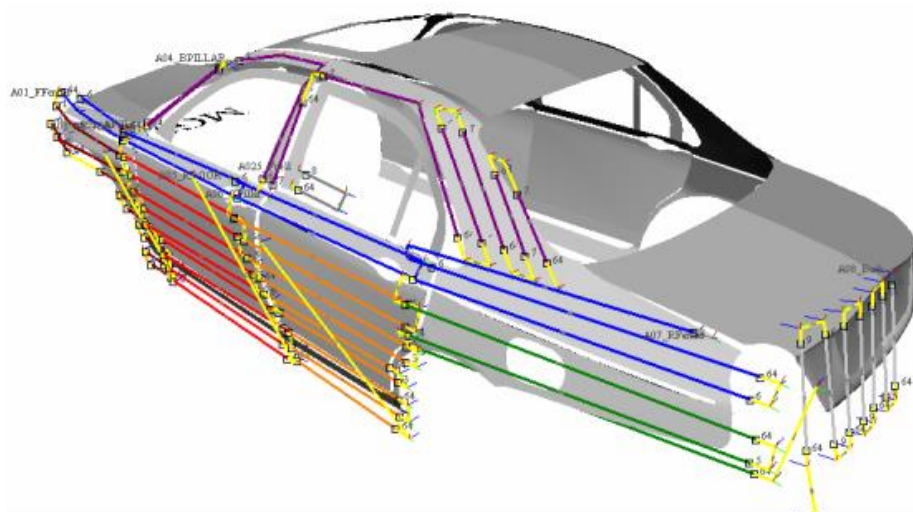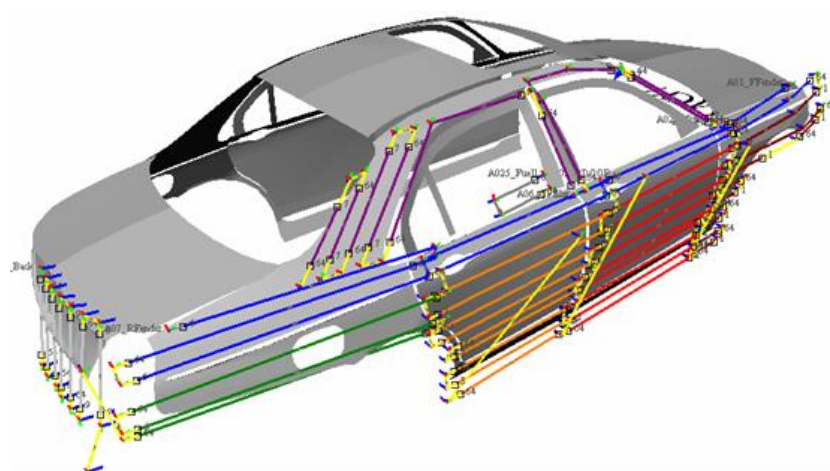

Supplement: s1 [file s1]
